# Supplementary material for: Facet-dependent peroxo species regulate product distribution and H2O2utilization in CeO2-catalyzed aniline oxidation
Source: Royal Society of Chemistry journal article supplement (doi:10.1039/d3ta02486e), 2023-01-01
Supplement: d3ta02486e1.pdf [file d3ta02486e1.pdf]

## Supporting Information for

### Facet-dependent Peroxo Species Regulate Product Distribution and H<sub>2</sub>O<sub>2</sub> Utilization in CeO<sub>2</sub>-catalyzed Aniline Oxidation

Linyuan Tian,<sup>1#</sup> Yin-Song Liao,<sup>2,3#</sup> Jyh-Pin Chou,<sup>4\*</sup> Zicong Tan,<sup>1</sup> Jian Lin Chen,<sup>5</sup> Jung-Hoon Lee,<sup>6\*</sup> Tsz Woon Benedict Lo<sup>7</sup> and Yung-Kang Peng<sup>1,8\*</sup>

<sup>1</sup>Department of Chemistry, City University of Hong Kong, Hong Kong SAR.

<sup>2</sup>Department of Materials Science and Engineering, National Tsing Hua University, Hsinchu 300, Taiwan.

<sup>3</sup>Tsing Hua Interdisciplinary Program, National Tsing Hua University, Hsinchu 300, Taiwan.

<sup>4</sup>Department and Graduate Institute of Physics, National Changhua University of Education, Changhua 500, Taiwan.

<sup>5</sup>Department of Applied Science, School of Science and Technology, Hong Kong Metropolitan University, Hong Kong SAR.

<sup>6</sup>Department of Chemistry, Soonchunhyang University, Asan 31538, Korea.

<sup>7</sup>Department of Applied Biology and Chemical Technology, The Hong Kong Polytechnic University, Hong Kong SAR.

<sup>8</sup>City University of Hong Kong Chengdu Research Institute, Chengdu, China.

#These authors contributed equally to this work

\*Correspondence: [ykpeng@cityu.edu.hk](mailto:ykpeng@cityu.edu.hk); [jhlee67@sch.ac.kr](mailto:jhlee67@sch.ac.kr); [jpchou@cc.ncue.edu.tw](mailto:jpchou@cc.ncue.edu.tw)

## Catalyst Preparation

CeO<sub>2</sub> cube and rod were prepared by a hydrothermal method. For CeO<sub>2</sub> cube, 0.651 g of Ce(NO<sub>3</sub>)<sub>3</sub>•6H<sub>2</sub>O and 3.6 g of NaOH were added to 30 ml H<sub>2</sub>O and then stirred for 30 minutes; CeO<sub>2</sub> rod was prepared as the same procedure but 7.2 g NaOH was used. The mixture was heated in Teflon-lined stainless steel under 180 °C and 100 °C for 24 hours, respectively. For CeO<sub>2</sub> octa., 0.8141 g of Ce(NO<sub>3</sub>)<sub>3</sub>•6H<sub>2</sub>O and 0.7005 g of hexamethylenetetramine were added to 110 mL H<sub>2</sub>O and stirred for 3 hours at 75 °C. All catalysts were collected by centrifugation and washed with ethanol for 5 times and then calcined at 200 °C before use.

## Catalytic testing

H<sub>2</sub>O<sub>2</sub> decomposition on CeO<sub>2</sub>. 5 mL methanol containing 7.5 mg of CeO<sub>2</sub> and 2.25 mmol H<sub>2</sub>O<sub>2</sub> was stirred at room temperature for 25 hours. To measure the residual H<sub>2</sub>O<sub>2</sub>, the solution collected at a specific time point was centrifuged at 14000 rpm for 4 mins to remove CeO<sub>2</sub>. 100 μL of the upper solution was mixed with 1.9 mL methanol for tracking the progress of H<sub>2</sub>O<sub>2</sub> decomposition by UV-vis spectroscopy at 240 nm ( $\epsilon_{240} = 39.4 \text{ M}^{-1} \text{ cm}^{-1}$ ). **Figure S4** shows the calibration line established using a series of H<sub>2</sub>O<sub>2</sub> solution with known concentration.

Michaelis-Menten kinetic analysis. Using methanol as solvent, 2 mL CeO<sub>2</sub> (0.8 mg/mL) was mixed with 2 mL H<sub>2</sub>O<sub>2</sub> solution with concentration of 10, 20, 40, 60, 80, 100, 160, 200, 300 mM in room temperature. Then, the initial rate ( $V_{\text{initial}}$ ) can be obtained by the decrease of H<sub>2</sub>O<sub>2</sub> concentration revealed by UV-vis spectroscopy at 240 nm in the given time. The corresponding maximum velocity ( $V_{\text{max}}$ ) can be obtained from the Michaelis-Menten equation below. The  $K_m$  is the substrate concentration (or H<sub>2</sub>O<sub>2</sub> concentration) where the initial reaction rate reaches 50% of its  $V_{\text{max}}$ .

$$V_{\text{initial}} = \frac{V_{\text{max}} \times [\text{H}_2\text{O}_2]}{K_m + [\text{H}_2\text{O}_2]}$$

In-situ Raman Measurements. 4 mg of CeO<sub>2</sub> was placed on the glass slide in square (2 mm × 2 mm). The Raman spectra was recorded at 0, 2, 5, and 8 mins after the addition of 4 μL of H<sub>2</sub>O<sub>2</sub> (5 M, methanol as solvent).

Aniline Oxidation with H<sub>2</sub>O<sub>2</sub>. 1.5 mmol aniline, 7.5 mg CeO<sub>2</sub>, and 2.25 mmol H<sub>2</sub>O<sub>2</sub> were added to 5 mL of methanol. Solution collected at each time point was centrifuged at 14000 rpm for 5 min to remove CeO<sub>2</sub> followed by product analysis by GC-MS (Agilent 5890, column, 30 m × 0.25 mm × 0.25 μm) and GC (Agilent 6890, column-TG-5SilMS, 30 m × 0.25 mm × 0.25 μm). The concentration of each product in the solution was determined by integrating the area of their peak and comparing these areas with commercial references. The conversion of aniline, and yield/selectivity of products can be calculated by equations below ( $n=1$  for nitrosobenzene and nitrobenzene,  $n=2$  for azoxybenzene)<sup>1</sup>:

$$\text{Conv.} = \frac{\sum n \times \text{mole of product}_x}{\text{initial moles of aniline}} \times 100\%$$
$$\text{Sel.}_x = \frac{n \times \text{mole of product}_x}{\sum n \times \text{mole of product}_x} \times 100\%$$
$$\text{Yield}_x = \text{Conv.} \times \text{Sel.}_x$$

### Density functional theory (DFT) calculation

The density functional theoretical calculations were conducted by using Vienna *Ab-initio* Simulation Package (VASP)<sup>2,3</sup>. The electron-ion interaction was described within the projected augmented wave method (PAW)<sup>4</sup> with cut-off energy of 460 eV, while the exchange-correlation functional was performed using generalized gradient approximation proposed by Perdew, Burke, and Ernzerhof<sup>5</sup>. The Hubbard U correction (DFT+U) was employed, with a specific strength of 3.5 eV for the delocalized f-orbital of cerium atom. Brillouin zone sampling was performed using a  $4 \times 4 \times 4$  *k*-mesh for the primitive cell, where the optimized lattice constant was 3.885 Å. All the relaxations were conducted with an electronic self-consistent loop criterion of  $10^{-5}$  eV. We constructed 6-layered  $5 \times 5$  supercell models of the (100), (110), and (111) surface with a vacuum thickness greater than 20Å. All atoms except for the bottom three layers, which were fixed to bulk geometry, were allowed to relax freely. We obtained the adsorption energy ( $E_{ad}$ ) using the following equation:

$$E_{ad} = E_{total} - E_{surface} - \mu$$

where the  $E_{total}$ ,  $E_{surface}$ , and  $\mu$  correspond to the total energy of the adsorbed system, bare surfaces, and chemical potential of adsorbates. To evaluate the reaction energy barriers, we implemented the climbing image nudge-elastic band method with the force-based optimizer, fast inertial relaxation engine (FIRE)<sup>6</sup>.

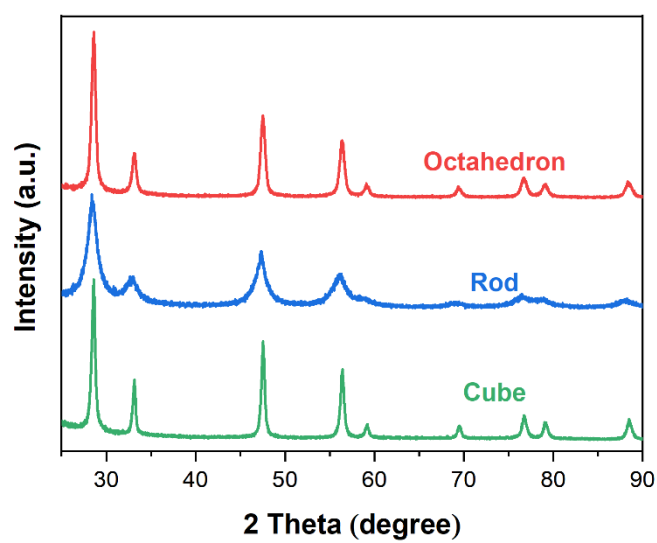

**Figure S1.** XRD patterns of CeO<sub>2</sub> samples.

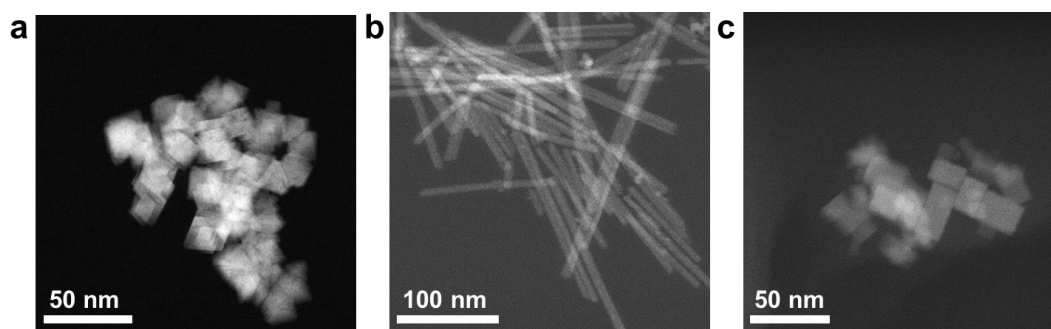

**Figure S2.** Annular dark-field STEM images of CeO<sub>2</sub> (a) octa., (b) rod, and (c) cube.

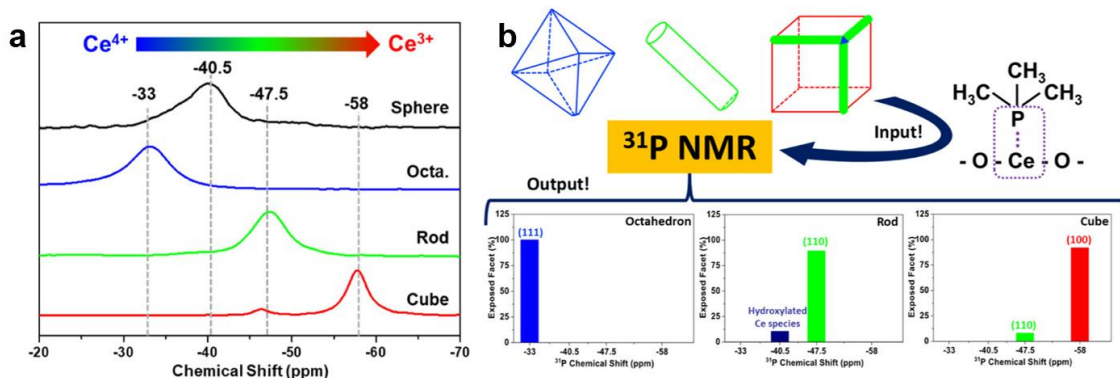

**Figure S3.** (a) TMP- $^{31}\text{P}$  NMR spectra of  $\text{CeO}_2$  morphologies, (b) information (i.e., chemical state, distribution, and concentration of surface Ce species) extracted from the deconvoluted TMP- $^{31}\text{P}$  NMR spectra of  $\text{CeO}_2$  morphologies.<sup>7</sup> Reproduced with permission from *ACS publisher*.

In our recent report, trimethylphosphine (TMP) was used as a  $^{31}\text{P}$  nuclear magnetic resonance (NMR) probe for the study of Ce chemical state among  $\text{CeO}_2$  surfaces.<sup>7</sup> TMP, a Lewis base molecule, can coordinate to a surface coordinated unsaturated metal cation (Lewis acid, LA) and span a wide  $\delta^{31}\text{P}$  range of -20 to -60 ppm in  $^{31}\text{P}$  NMR.  $\delta^{31}\text{P}$  of this TMP-LA adduct can be used to differentiate cations with various LA strengths on facets because a strong surface LA site will form a stronger chemical bond with TMP and shift  $\delta^{31}\text{P}$  to positive ppm.  $\text{CeO}_2$  nanocrystallites in the shape of octahedron, rod, and cube were thus examined by this TMP- $^{31}\text{P}$  NMR technique. As shown in the **Figure S3a**, the distribution of the Ce chemical state is shape-dependent with decreasing  $\delta^{31}\text{P}$  of TMP-Ce adducts: -33 ppm for octahedron > -47.5 ppm for rod > -58 ppm for cube. DFT calculation was also employed to correlate the  $\delta^{31}\text{P}$  with their dominant surface (i.e., (111) for octahedron, (110) for rod, and (100) for cube). The distribution of facets for  $\text{CeO}_2$  octahedron, rod, and cube was concluded in **Figure S3b**. For the octahedron sample, the only signal with high symmetry at -33 ppm confirms the well-defined (111) surface. Unfortunately, the trace amount of the (100) surface believed at the tips of this shape cannot be observed in the  $^{31}\text{P}$  NMR spectrum at around -58 ppm. For the rod sample, no signal at -33 and -58 ppm but an extra broad shoulder at -40.5 ppm suggests no detectable (111) and (100) facet exposure and that ~10% of surface Ce atoms are hydroxylated Ce species (similar to a sphere surface). For the cube sample, the peak area of the extra signal at -47.5 ppm further suggests that 8% surface Ce is hosted by the (110) facet at cube edges, matching well with the molecular dynamic prediction of the (110)/(100) ratio in the  $\text{CeO}_2$  cube (~10%).<sup>8</sup> Since three shapes are all enclosed  $\geq 90\%$  by their dominant surface, we only consider one surface for each morphology herein to simplify the study on the role of their Ce coordination structures in aniline oxidation.

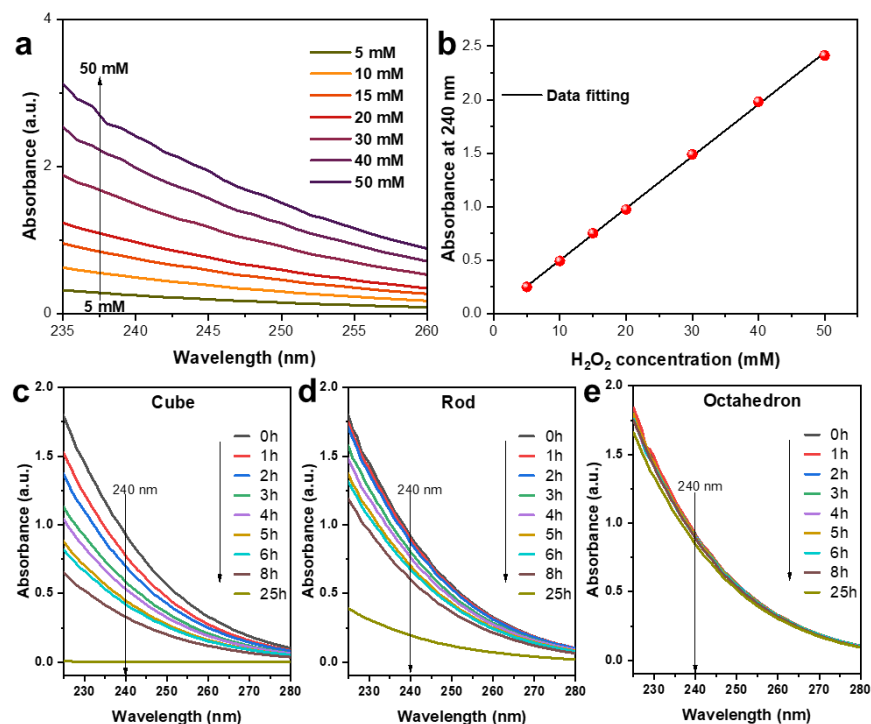

**Figure S4.** (a) UV-Vis spectral of  $\text{H}_2\text{O}_2$  with different concentrations and (b) the corresponding calibration curve of absorbance at 240 nm and  $\text{H}_2\text{O}_2$  concentrations. (c-e) UV-vis spectral of  $\text{H}_2\text{O}_2$  decrease on cube, rod, and octahedron without aniline. Reaction condition: 5 mL methanol containing 7.5 mg of  $\text{CeO}_2$  and 2.25 mmol  $\text{H}_2\text{O}_2$  was stirred at room temperature.

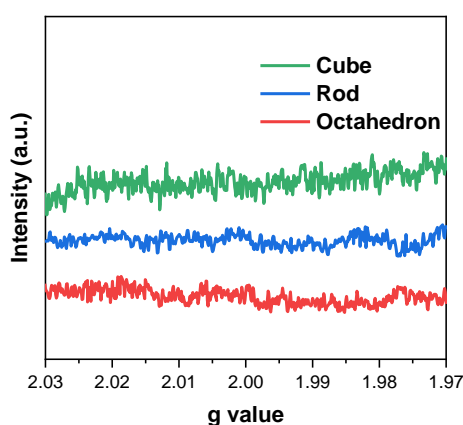

**Figure S5.** Electron paramagnetic resonance (EPR) results of  $\text{CeO}_2$  samples and no signal of surface oxygen vacancy-associated Ce sites ( $g = 2.00$ ) was found. This result is consistent with the literature that this signal should appear only when pristine  $\text{CeO}_2$  is reduced or doped with foreign atoms.<sup>9-11</sup>

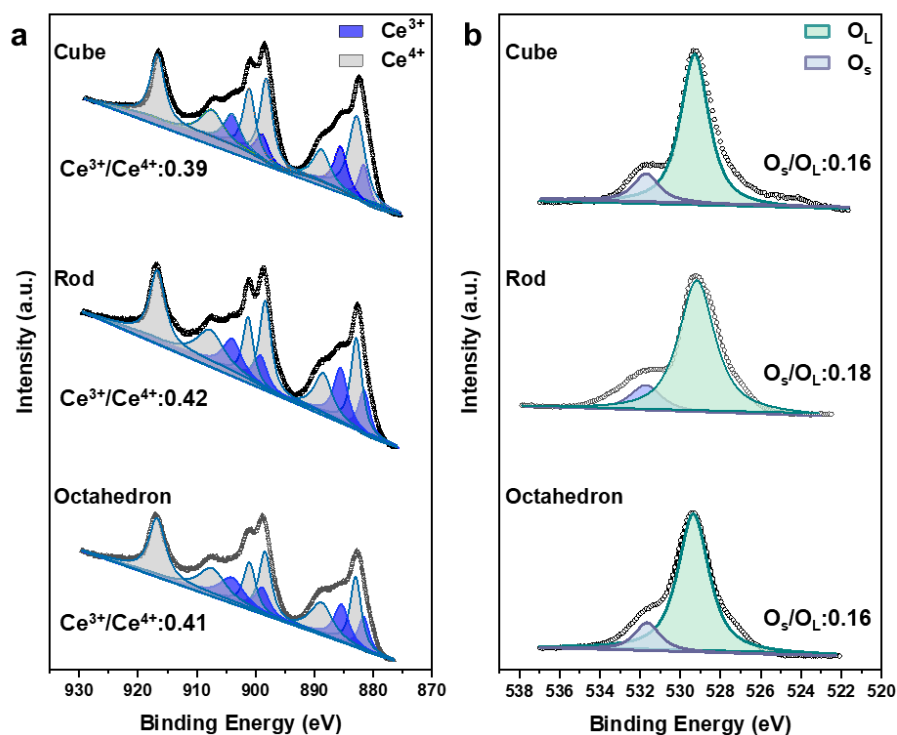

**Figure S6.** The deconvoluted XPS spectra of CeO<sub>2</sub> samples in (a) Ce<sub>3d</sub> and (b) O<sub>1s</sub> regions.

The similar Ce<sup>3+</sup>/Ce<sup>4+</sup> ratio obtained among CeO<sub>2</sub> samples suggests that this factor should also play a negligible role in the selective H<sub>2</sub>O<sub>2</sub> activation. Note that the XPS Ce<sup>3+</sup> signal here can be attributed to the abundant coordinated unsaturated Ce sites on crystal surface (**Scheme 1d**). The quantity of surface OH groups was approached from the corresponding XPS O<sub>1s</sub> range. Accordingly, all shapes exhibit a main peak of lattice oxygens (O<sub>L</sub>) at 529.6 eV and a shoulder peak of surface O-relevant species (O<sub>S</sub>) at 531.7 eV with a similar O<sub>S</sub>/O<sub>L</sub> ratio. This, together with the negligible oxygen vacancy-associated Ce sites revealed by EPR (**Figure S5**), suggests that CeO<sub>2</sub> shapes bear a comparable amount of surface OH groups, which again cannot account for their extreme results in H<sub>2</sub>O<sub>2</sub> activation.

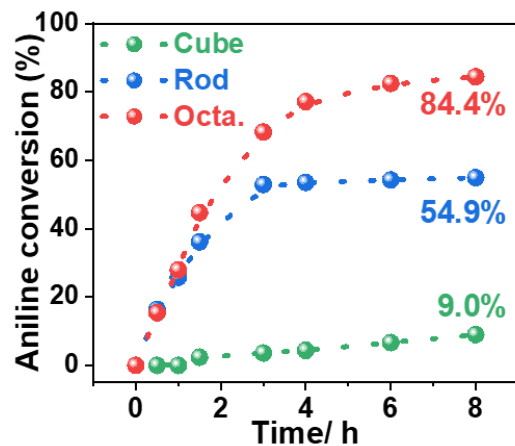

**Figure S7.** The time-dependent overall aniline conversion for CeO<sub>2</sub> samples.

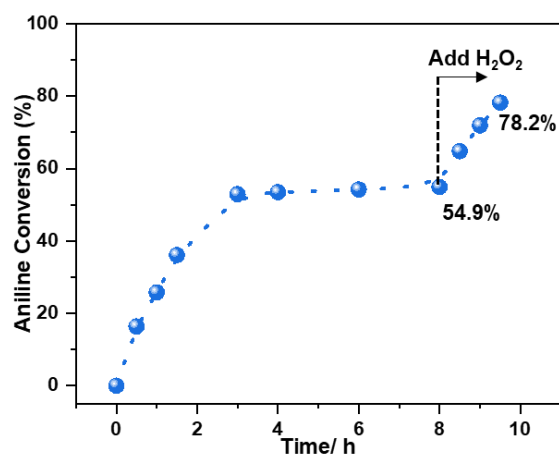

**Figure S8.** The conversion of aniline over CeO<sub>2</sub> rod with time. The reaction continues upon the addition of 2 mmol H<sub>2</sub>O<sub>2</sub> at 8 hours of reaction.

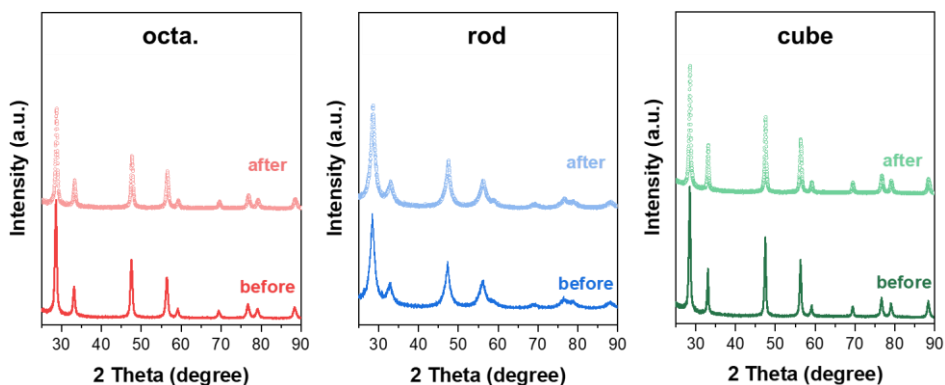

**Figure S9.** XRD patterns of CeO<sub>2</sub> samples before and after the reaction.



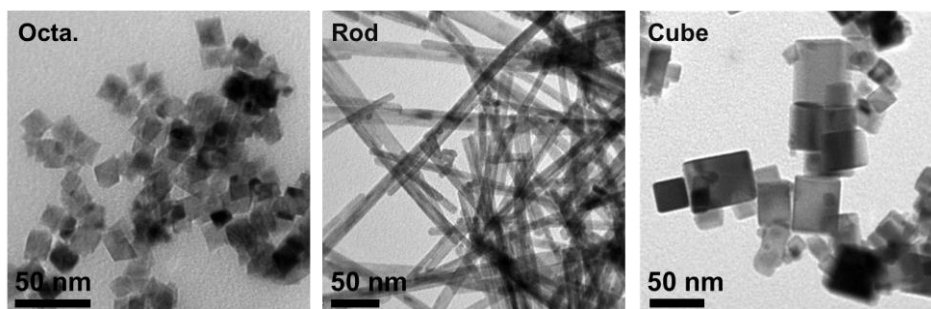

**Figure S10.** TEM images of the spent CeO<sub>2</sub> samples.

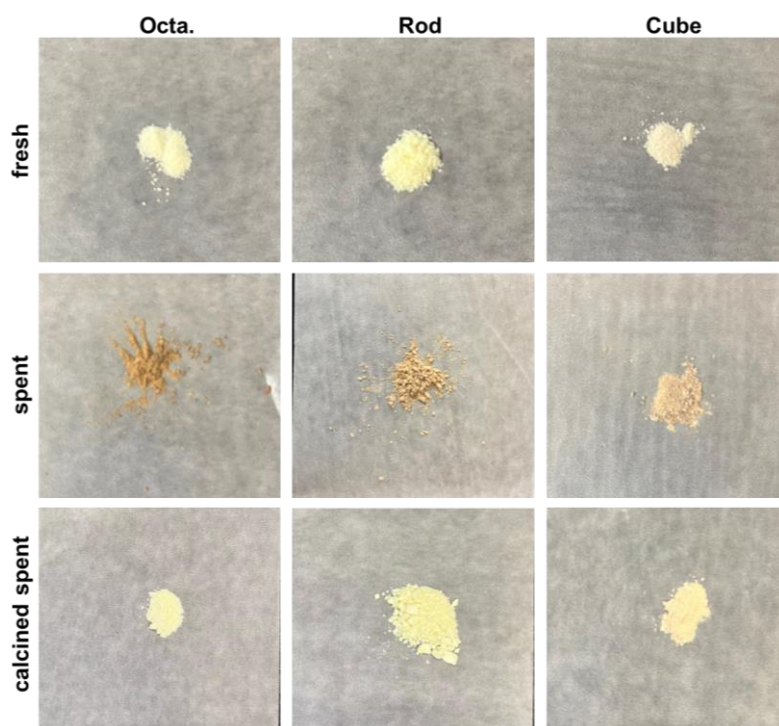

**Figure S11.** Digital photos of the (a) fresh, (b) spent, and (c) calcined spent CeO<sub>2</sub> samples.

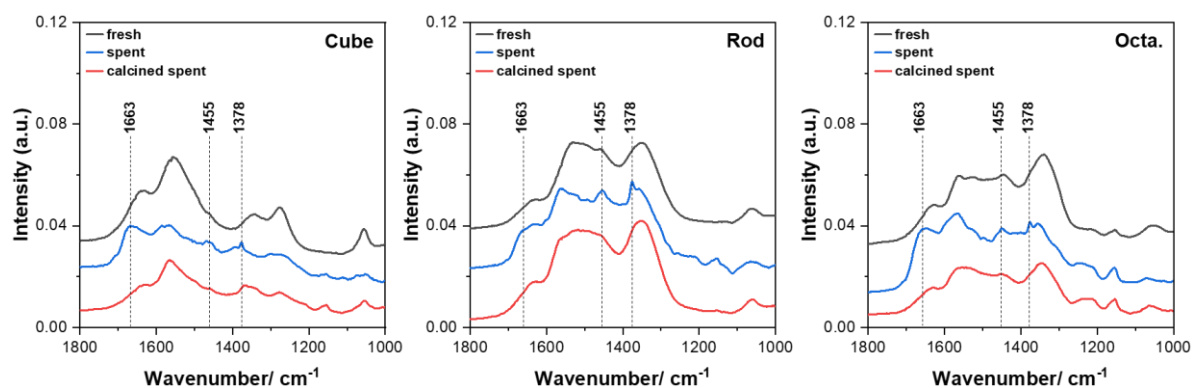

**Figure S12** Infrared spectra of the fresh (black line), spent (blue line), and calcined spent (red line) CeO<sub>2</sub> samples. The adsorption of N-relevant species during the reaction can be supported by the emerging infrared (IR) signals of N=O stretching at 1455 and 1378 cm<sup>-1</sup> for the spent CeO<sub>2</sub> samples.<sup>12</sup> Although the origin of the IR signal at 1663 cm<sup>-1</sup> is still unknown, these N-relevant species can be removed by calcinating at 200°C as evidenced by the disappearance of these IR signals for the calcined spent samples.

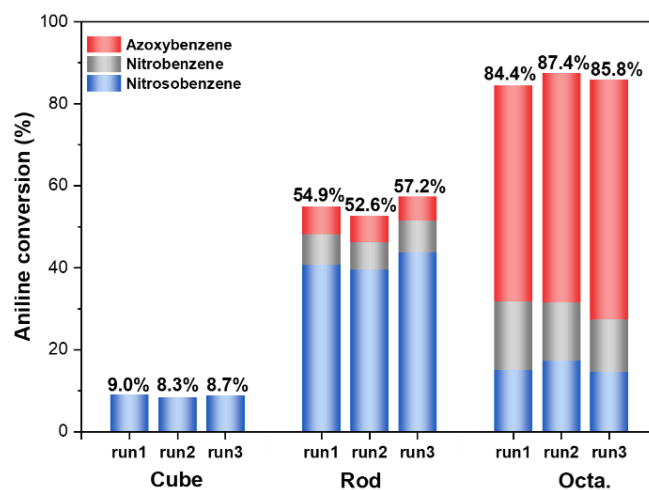

**Figure S13.** Aniline conversion and product distribution for CeO<sub>2</sub> samples in three runs.

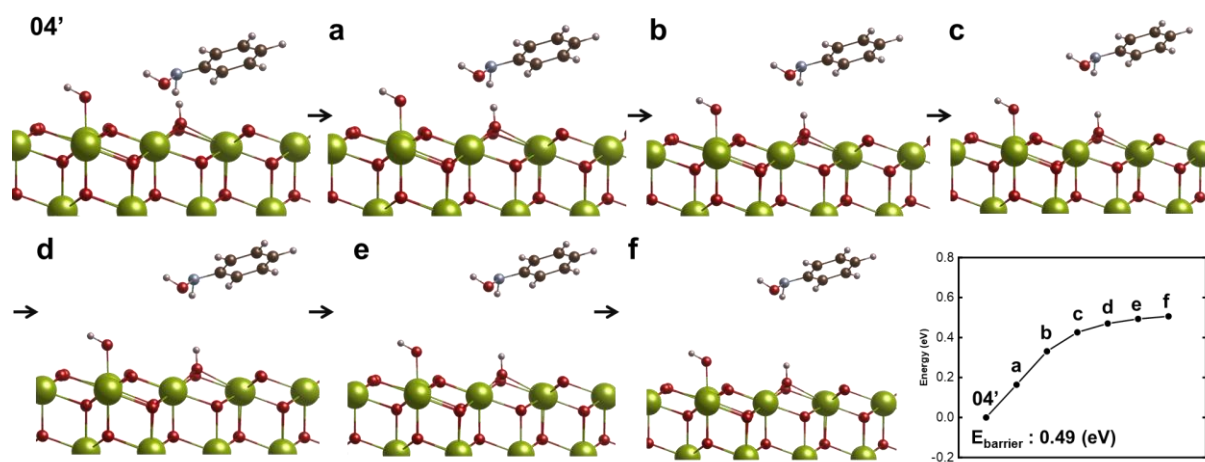

**Figure S14.** Re-optimized state 4 for the calculation of the desorption energy required for Ph-NHOH on (111) surface.

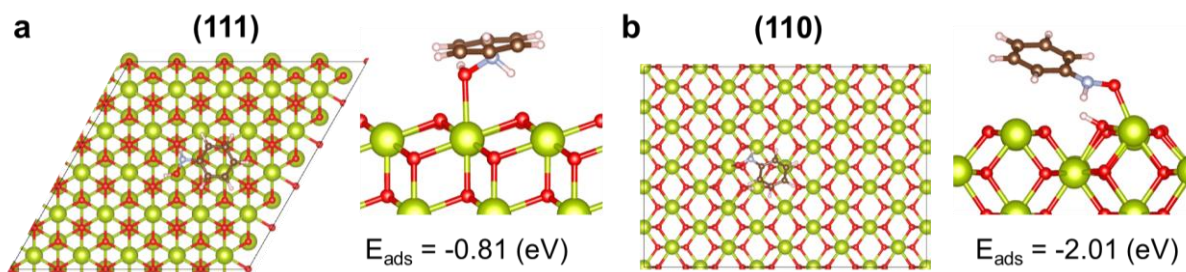

**Figure S15.** The adsorption of Ph-NHOH on CeO<sub>2</sub> (a) (111) and (b) (110) surfaces.

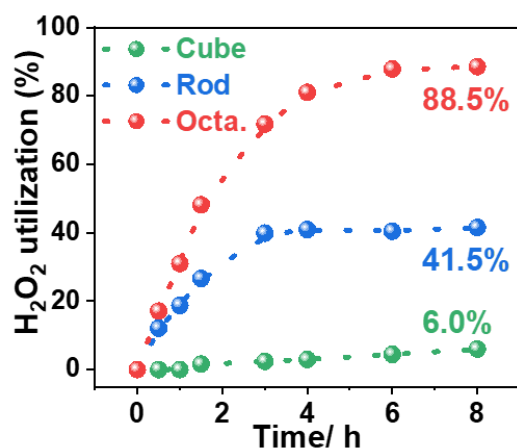

**Figure S16.** H<sub>2</sub>O<sub>2</sub> utilization for CeO<sub>2</sub> samples as a function of time.

According to **Scheme 3**, aniline was found to be oxidized by HO<sub>2</sub> radicals to give nitrosobenzene as the sole product on the (100) surface. Since HO<sub>2</sub> radicals are generated by the oxidation of H<sub>2</sub>O<sub>2</sub> by OH radicals, the production of nitrosobenzene thus consumes two H<sub>2</sub>O<sub>2</sub>. The utilization of H<sub>2</sub>O<sub>2</sub> for the cube sample is thus calculated as (2\* moles of nitrosobenzene)/initial moles of H<sub>2</sub>O<sub>2</sub>. As for the (111) surface, one end-on peroxy species specifically oxidize aniline to produce one Ph-NHOH. The further oxidation of Ph-NHOH to nitrosobenzene will consume one more H<sub>2</sub>O<sub>2</sub>. Since nitrosobenzene involves in 1) condensation reaction with Ph-NHOH to produce azoxybenzene and 2) oxidation reaction by another end-on peroxy species to give nitrobenzene. Given this, the utilization of H<sub>2</sub>O<sub>2</sub> for the octa. sample was calculated as (2\* moles of nitrosobenzene + 2\*moles of azoxybenzene + 3\*moles of nitrobenzene)/initial moles of H<sub>2</sub>O<sub>2</sub>. As for the (110) surface, aniline is directly oxidized by the side-on peroxy species to give nitrosobenzene. The production of one nitrosobenzene thus only requires one H<sub>2</sub>O<sub>2</sub> on this surface. Since nitrosobenzene can be further oxidized to nitrobenzene by another side-on peroxy species, the generation of nitrobenzene thus needs two H<sub>2</sub>O<sub>2</sub>. Given that our rod sample is not perfectly enclosed by (110) surface (see <sup>31</sup>P NMR spectrum in **Figure S3**), the tiny amount of azoxybenzene observed for this sample should be attributed to the presence of hydroxylated Ce sites (~10%) on (111) surface. Therefore, the utilization of H<sub>2</sub>O<sub>2</sub> is equal to (1\* moles of nitrosobenzene + 2\*moles of nitrobenzene + 2\*moles of azoxybenzene)/initial moles of H<sub>2</sub>O<sub>2</sub>.

**Table S1.** The condensation of Ph-NHOH and nitrosobenzene at room temperature in the absence and presence of CeO<sub>2</sub> samples [Reaction condition: 5 mg CeO<sub>2</sub>, 0.1 mmol Ph-NHOH, 0.1 mmol nitrosobenzene, 5 mL methanol, 30 minutes, room temperature].

| Entry | Catalyst | Time (h) | Reaction                                                                          | Conversion of Ph-NHOH |
|-------|----------|----------|-----------------------------------------------------------------------------------|-----------------------|
| 1     | —        | 0.5      | 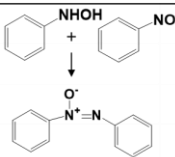 | >95%                  |
| 2     | Cube     | 0.5      |                                                                                   | >95%                  |
| 3     | Rod      | 0.5      |                                                                                   | >95%                  |
| 4     | Octa.    | 0.5      |                                                                                   | >95%                  |

## References:

1. Y. Tao, B. Singh, V. Jindal, Z. Tang and P. P. Pescarmona, *Green Chem.*, 2019, **21**, 5852-5864.
2. G. Kresse and J. Furthmüller, *Phys. Rev. B*, 1996, **54**, 11169.
3. G. Kresse and J. Furthmüller, *Comput. Mater. Sci.*, 1996, **6**, 15-50.
4. G. Kresse and D. Joubert, *Phys. Rev. B*, 1999, **59**, 1758.
5. J. P. Perdew, K. Burke and M. Ernzerhof, *Phys. Rev. Lett.*, 1996, **77**, 3865.
6. E. Bitzek, P. Koskinen, F. Gähler, M. Moseler and P. Gumbsch, *Phys. Rev. Lett.*, 2006, **97**, 170201.
7. Z. Tan, G. Li, H.-L. Chou, Y. Li, X. Yi, A. H. Mahadi, A. Zheng, S. C. Edman Tsang and Y. K. Peng, *ACS Catal.*, 2020, **10**, 4003-4011.
8. U. Castanet, C. Feral-Martin, A. Demourgues, R. L. Neale, D. C. Sayle, F. Caddeo, J. M. Flitcroft, R. Caygill, B. J. Pointon, M. Molinari and J. Majimel, *ACS Appl. Mater. Interfaces*, 2019, **11**, 11384.
9. Y. Ding, L. Huang, J. Zhang, A. Guan, Q. Wang, L. Qian, L. Zhang and G. Zheng, *J. Mater. Chem. A*, 2020, **8**, 7229-7234.
10. Y. Ji, M. Yang, W. Cheng, C. Li and X. Liu, *Energy Adv.*, 2022, **1**, 868-871.
11. Z. Li, Z. Deng, L. Ouyang, X. Fan, L. Zhang, S. Sun, Q. Liu, A. A. Alshehri, Y. Luo and Q. Kong, *Nano Res.*, 2022, **15**, 8914-8921.
12. D. Combata, P. Concepción and A. Corma, *J. Catal.*, 2014, **311**, 339-349.
